# Supplementary material for: Combining Position Weight Matrices and Document-Term Matrix for Efficient Extraction of Associations of Methylated Genes and Diseases from Free Text
Source: PubMed Central journal article supplement (PMC3797705; doi:10.1371/journal.pone.0077848), 2013-10-16
Supplement: pone.0077848.s001.pdf [file pone.0077848.s001.pdf]

# Combining position weight matrices and document-term matrix for efficient extraction of associations of methylated genes and diseases from free text

Arwa Bin Raies<sup>1</sup>, Hicham Mansour<sup>2</sup>, Roberto Incitti<sup>2</sup> and Vladimir B. Bajic<sup>1,\*</sup>

<sup>1</sup>Computational Bioscience Research Centre (CBRC), Computer, Electrical and Mathematical Sciences and Engineering Division (CEMSE), King Abdullah University of Science and Technology (KAUST), Thuwal, 23955-6900, Saudi Arabia

<sup>2</sup>Bioscience Core Laboratories, King Abdullah University of Science and Technology (KAUST), Thuwal, 23955-6900, Saudi Arabia

## Supplementary Information S1

### Description of different computations

#### Information Gain

$$G(t) = -\sum_{i=1}^m P(c_i) \log P(c_i) + P(t) \sum_{i=1}^m P(c_i|t) \log P(c_i|t) + P(\bar{t}) \sum_{i=1}^m P(c_i|\bar{t}) \log P(c_i|\bar{t})$$

where  $m$  is the number of classes,  $P(c_i)$  is the probability of the class  $c_i$ ,  $P(t)$  is the probability of the term  $t$ ,  $P(c_i|t)$  is the probability of a class given the term,  $P(\bar{t})$  is the probability that the term does not appear, and  $P(c_i|\bar{t})$  is the probability of the class given the term does not appear.

#### Term-Frequency Inverse-Document-Frequency

$$TF - IDF = tf \times \log \frac{N}{n}$$

where  $tf$  number of times a term occurs in a sentence,  $N$  is the total number of sentences, and  $n$  is the number of sentences in which the term appears.

#### Z-score Normalization

$$\hat{v} = \frac{v - \bar{A}}{\sigma_A}$$

where  $v$  is a value of attribute  $A$ ,  $\bar{A}$  is the mean of the attribute  $A$ , and  $\sigma_A$  is the standard deviation of the attribute  $A$ .
